# Supplementary material for: Human Recombinant Apyrase Therapy Protects Against Myocardial Ischemia/Reperfusion Injury and Preserves Left Ventricular Systolic Function in Rats, as Evaluated by 7T Cardiovascular Magnetic Resonance Imaging
Source: PubMed Central journal article supplement — Korean J Radiol. 2020 Apr 6;21(6):647–59. doi: 10.3348/kjr.2019.0853 (PMC7231619; doi:10.3348/kjr.2019.0853), 2020-04-06
Supplement: kjr-21-647-s001.pdf [file kjr-21-647-s001.pdf]

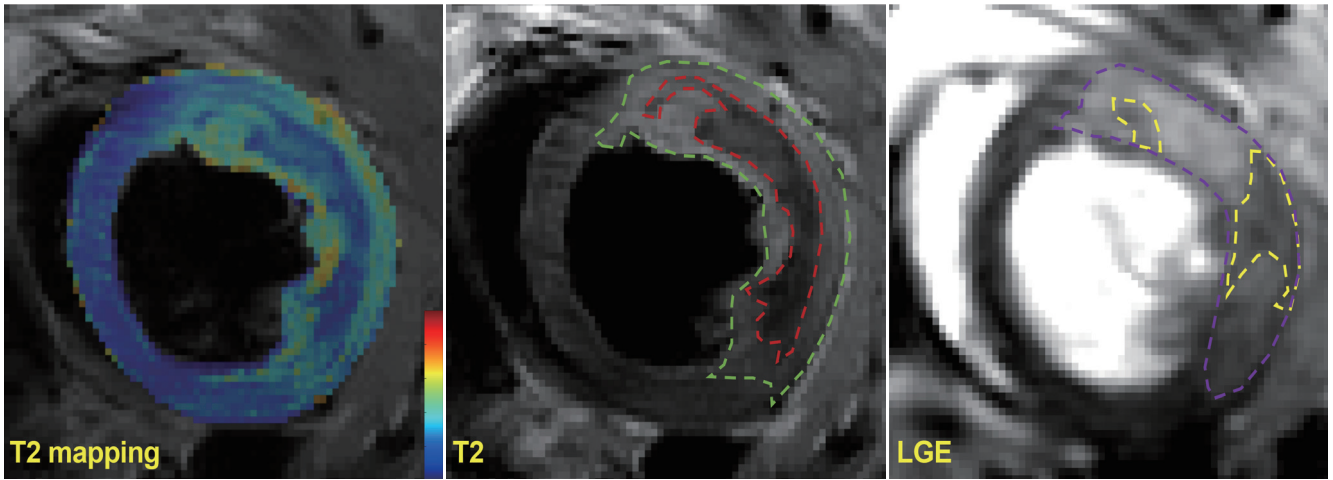

**Supplementary Fig. 1. Definition of edema, IMH, infarct, and MVO area.** Green, red, yellow, and purple dotted lines represent contours of edema, IMH, infarct, and MVO area. IMH = intramyocardial hemorrhage, LGE = late gadolinium enhancement, MVO = microvascular obstruction
